# Supplementary material for: CRISPR/Cas9 and piggyBac Transposon-Based Conversion of a Pathogenic Biallelic TBCD Variant in a Patient-Derived iPSC Line Allows Correction of PEBAT-Related Endophenotypes
Source: MDPI journal article supplement (doi:10.3390/ijms24097988), 2023-04-28
Supplement: s1 [file s1]

**SUPPLEMENTARY INFORMATION**

**Supplementary Figure S1: MTT assay and Trilineage differentiation assay**  
**Supplementary Table S1: List of primers used in this study**

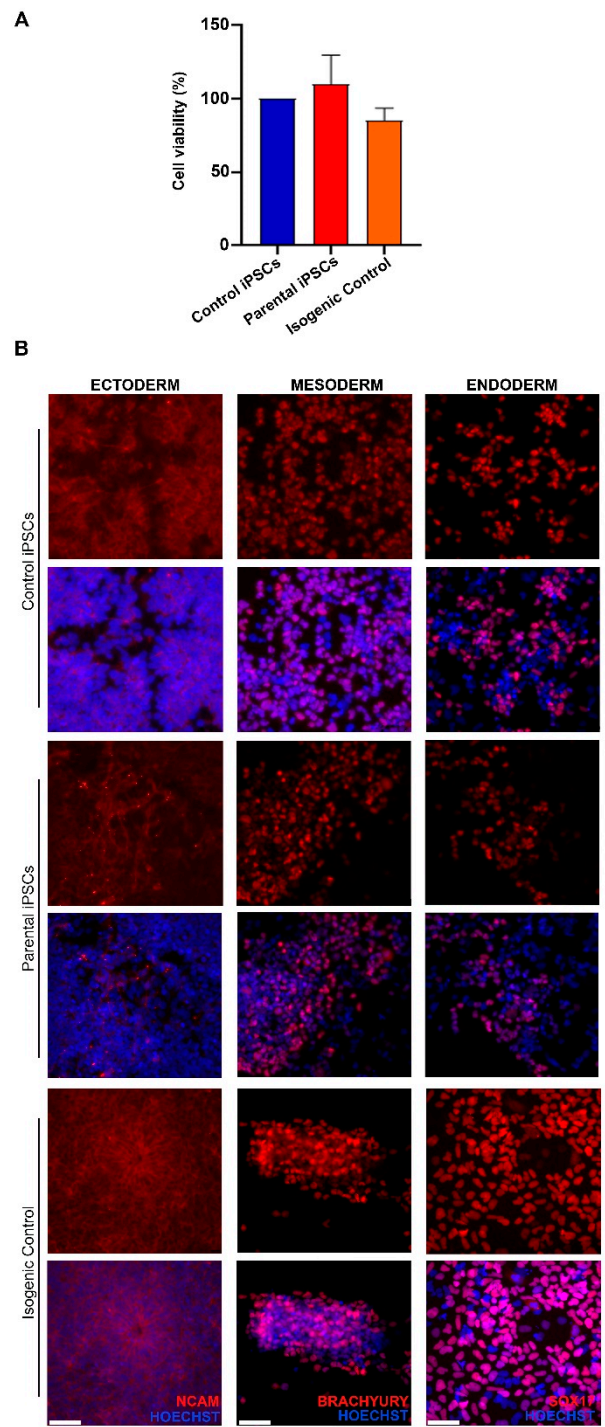

**Figure S1: Isogenic iPSC line maintains its proliferative potential and its ability to differentiate into the three embryonic germ layers. (A)** Cell proliferation was estimated via MTT assay. The

histogram represents the percentage of viable parental and isogenic iPSCs compared with control cells (control iPSCs, 100%). Data are presented as mean  $\pm$  SEM (normalized to control), n = 3. Ordinary one-way ANOVA parametric test is used to assess statistical significance. (B) Confocal micrographs of endoderm (SOX17), mesoderm (BRACHYURY) and ectoderm (NCAM) markers show the functional ability of control iPSCs, parental iPSCs and isogenic lines to differentiate into cells belonging to the three germ layers. Scale bar = 50  $\mu$ m.

**Table S1: List of primers used in this study**

| Primer         | Sequence (5'-3')                    | Applications                      |
|----------------|-------------------------------------|-----------------------------------|
| P1             | ATGTTCAAAGCAGTCGCAATGG              | Amplification Genomic DNA of TBCD |
| P2             | TCTCACCTGCTCTCTATTAACC              |                                   |
| TBCDwt         | F:TCTGCCACCGTTTCCCGCTGGTGAGTGCCTGC  | Mutagenesis                       |
|                | R: GCAGGCACTCACCAGCGGGAAACGGTGGCAGA |                                   |
| PU $\Delta$ TK | F:AACCCTAGAAAGATAGTCTGC             | Amplification selection cassette  |
|                | R:AACCCTAGAAAGATAATCATA             |                                   |
| P3             | AGAAGCTCCTGTCAGGCATCGC              | Screening targeted clones         |
| P4             | ACAAGGGTAGCGGCGAAGATCC              |                                   |
| P5             | AGCAATGTCTCGTACACCTGG               |                                   |
| M-PCR-TBCD     | F:CATGTGCTGCTCCCGGCAG               | multiplex PCR                     |
|                | R:AACACAACAGTGCCAGCGAAG             |                                   |
| M-PCR-GAPDH    | F:CTACACTGAGCACCAGGTG               | multiplex PCR                     |
|                | R:CCAGCAAGAGCACAAAGAGG              |                                   |
| crRNA 1        | CCGTTTCCCGCTGGTGAGTGCCT             | gRNA (1)                          |
| crRNA 2        | GCTCACGTGTGTTTGCCGTGTGG             | gRNA (2)                          |
| OT2            | F:AGGATCGTGGATCAGCCTGC              | Amplification off-target          |
|                | R: ACCTTCTCCACCTTCCGTG              |                                   |
| OT3            | F:GGATTGGGTGCTGTTAAGGGA             | Amplification off-target          |
|                | R:TCACAAAACACCAGCATCAGA             |                                   |
| OT4            | F:ATGCCCTGGTTGCTCCAGAG              | Amplification off-target          |
|                | R:CAGGTTTCTGGCCAGAAGAACC            |                                   |
| OT5            | F:CTGTCTGACCTGACAAGCCA              |                                   |

|       |                           |                          |
|-------|---------------------------|--------------------------|
|       | R:CCGAAATCAGCTTTGGTCTTG   | Amplification off-target |
| OT6   | F:TCCCTCCTCCTCTTTCAGTGC   | Amplification off-target |
|       | R:CAGCGAGGATCGTGCTGGTTTC  |                          |
| OT7   | F:CTTGCTAGCCACCCACCGAAT   | Amplification off-target |
|       | R:TCATCCCTGACCCTAAGCACAAA |                          |
| OT8   | F:TAACCGCGGGCTACACAGT     | Amplification off-target |
|       | R:GCTCTGTAACCTGGGAGAC     |                          |
| OT9   | F:TTCAGTTCGCTGTGCTCGGC    | Amplification off-target |
|       | R:CCATCACTAGAGTCCGCTGTG   |                          |
| OT10  | F:CTGGGCCCCTCCACACACAG    | Amplification off-target |
|       | R:GGGACAGCTGTTGCAGCTCAGC  |                          |
| GAPDH | F:TGCACCACCAACTGCTTAGC    | qPCR                     |
|       | R:GGCATGGACTGTGGTCATGAG   |                          |
| OCT4  | F:AGCGAACCAGTATCGAGAAC    | qPCR                     |
|       | R:TTACAGAACCACACTCGGAC    |                          |
| SOX2  | F:AGCTACAGCATGATGCAGGA    | qPCR                     |
|       | R:GGTCATGGAGTTGTACTGCA    |                          |
